# Supplementary material for: A retrospective analysis of the effect of discussion in teleconference and face-to-face scientific peer-review panels
Source: HighWire-hosted journal article supplement (doi:10.1136/bmjopen-2015-009138), 2015-09-01

Supplementary Figures:

**Figure S1a. Relationship between average pre-meeting scores (APS) and average  $\Delta_A$  for face-to-face reviews in 2009 & 2010.**

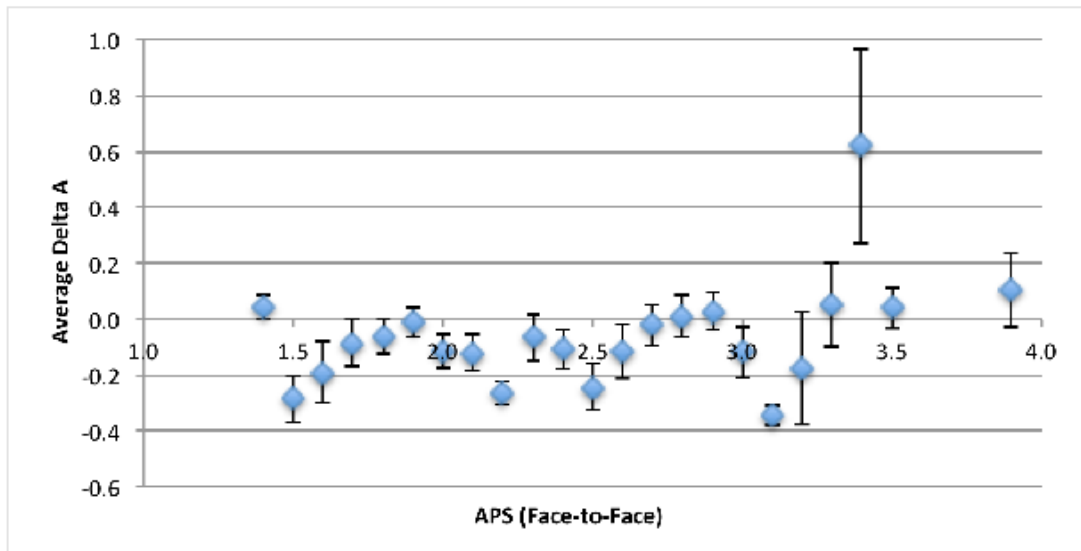

**Figure S1b. Relationship between average pre-meeting scores (APS) and average  $\Delta_A$  for teleconference reviews in 2011 and 2012.**

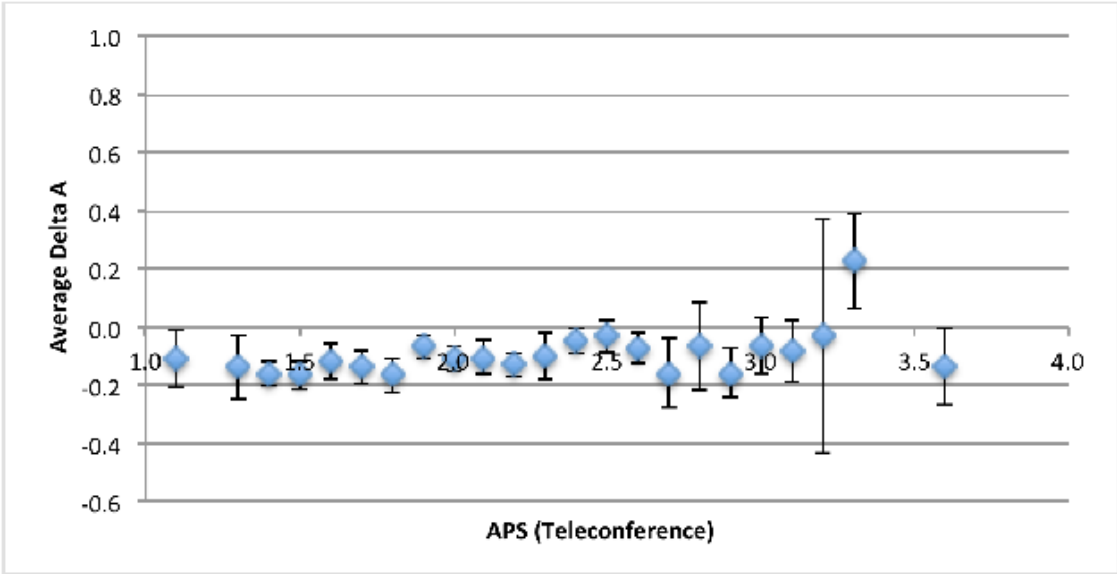

Supplement: bmjopen-2015-009138supp_figures.pdf [file bmjopen-2015-009138supp_figures.pdf]
