# Supplementary material for: A retrospective analysis of the effect of discussion in teleconference and face-to-face scientific peer-review panels
Source: HighWire-hosted journal article supplement (doi:10.1136/bmjopen-2015-009138), 2015-09-01
Supplement: bmjopen-2015-009138supp_tableS2.pdf [file bmjopen-2015-009138supp_tableS2.pdf]

**Table S2. Changes in primary reviewer scores as compared to the changes of the secondary reviewer scores for the face-to-face (Table S2a) and teleconference (Table S2b) settings.**

**Table S2a. Face-to-Face**

| Primary Reviewer      | Secondary Reviewer | % of Sub-Group | % of Entire Sample |
|-----------------------|--------------------|----------------|--------------------|
| <b>Improved Score</b> | Improved Score     | 18.8%          | 3.5%               |
| <b>Improved Score</b> | Poorer Score       | 37.5%          | 6.9%               |
| <b>Improved Score</b> | No Change          | 43.8%          | 8.1%               |
| <b>Total</b>          | <b>Total</b>       | <b>100.0%</b>  | <b>18.5%</b>       |
| <b>Poorer Score</b>   | Improved Score     | 19.8%          | 8.5%               |
| <b>Poorer Score</b>   | Poorer Score       | 33.3%          | 14.2%              |
| <b>Poorer Score</b>   | No Change          | 46.8%          | 20.0%              |
| <b>Total</b>          | <b>Total</b>       | <b>100.0%</b>  | <b>42.7%</b>       |
| <b>No Change</b>      | Improved Score     | 20.8%          | 8.1%               |
| <b>No Change</b>      | Poorer Score       | 44.6%          | 17.3%              |
| <b>No Change</b>      | No Change          | 34.7%          | 13.5%              |
| <b>Total</b>          | <b>Total</b>       | <b>100.0%</b>  | <b>38.8%</b>       |

**Table S2b. Teleconference**

| Primary Reviewer      | Secondary Reviewer | % of Sub-Group | % of Entire Sample |
|-----------------------|--------------------|----------------|--------------------|
| <b>Improved Score</b> | Improved Score     | 17.9%          | 2.4%               |
| <b>Improved Score</b> | Poorer Score       | 32.1%          | 4.2%               |
| <b>Improved Score</b> | No Change          | 50.0%          | 6.6%               |
| <b>Total</b>          | <b>Total</b>       | <b>100.0%</b>  | <b>13.2%</b>       |
| <b>Poorer Score</b>   | Improved Score     | 15.2%          | 4.7%               |
| <b>Poorer Score</b>   | Poorer Score       | 30.3%          | 9.4%               |
| <b>Poorer Score</b>   | No Change          | 54.5%          | 17.0%              |
| <b>Total</b>          | <b>Total</b>       | <b>100.0%</b>  | <b>31.1%</b>       |
| <b>No Change</b>      | Improved Score     | 18.6%          | 10.4%              |
| <b>No Change</b>      | Poorer Score       | 30.5%          | 17.0%              |
| <b>No Change</b>      | No Change          | 50.8%          | 28.3%              |
| <b>Total</b>          | <b>Total</b>       | <b>100.0%</b>  | <b>55.7%</b>       |
