# Supplementary material for: A retrospective analysis of the effect of discussion in teleconference and face-to-face scientific peer-review panels
Source: HighWire-hosted journal article supplement (doi:10.1136/bmjopen-2015-009138), 2015-09-01
Supplement: bmjopen-2015-009138supp_tableS3.pdf [file bmjopen-2015-009138supp_tableS3.pdf]

**Table S3. Summary data for  $\Delta_{\text{PRI}}$ ,  $\Delta_{\text{SEC}}$ ,  $\Delta_{\text{A}}$**

|                                                                                | $\Delta_{\text{PRI}}$ FTF | $\Delta_{\text{PRI}}$ TCON | $\Delta_{\text{SEC}}$ FTF | $\Delta_{\text{SEC}}$ TCON | $\Delta_{\text{A}}$ FTF | $\Delta_{\text{A}}$ TCON |
|--------------------------------------------------------------------------------|---------------------------|----------------------------|---------------------------|----------------------------|-------------------------|--------------------------|
| <b>Average Value</b>                                                           | -0.11                     | -0.08                      | -0.10                     | -0.08                      | -0.09                   | -0.10                    |
| <b>Median Value</b>                                                            | 0.00                      | 0.00                       | 0.00                      | 0.00                       | -0.07                   | -0.07                    |
| <b>Range of Values</b>                                                         | -1.5 to 2.0               | -1.2 to 1.1                | 1.5 to 2.4                | -2.4 to 1.0                | -1.1 to 1.0             | -1.0 to 0.7              |
| <b>% of scores that improved (+<math>\Delta</math>) / average / median</b>     | 18.5% / 0.4 / 0.3         | 13.2% / 0.3 / 0.3          | 20.0% / 0.5 / 0.3         | 17.5% / 0.3 / 0.3          | 26.2% / 0.3 / 0.2       | 20.8% / 0.2 / 0.1        |
| <b>% of scores that stayed the same (<math>\Delta = 0</math>)</b>              | 38.8%                     | 55.7%                      | 41.5%                     | 51.9%                      | 20.4%                   | 22.6%                    |
| <b>% of scores that became worse (-<math>\Delta</math>) / average / median</b> | 42.7% / -0.4 / -0.3       | 31.1% / -0.4 / -0.3        | 38.5% / -0.5 / -0.4       | 30.7% / -0.4 / -0.3        | 53.5% / -0.3 / -0.2     | 56.6% / -0.2 / -0.2      |
| <b>% of <math>\Delta</math> in high / moderate / low ranges</b>                | 10.8% / 28.5% / 21.9%     | 6.6% / 18.9% / 18.9%       | 15.4% / 26.5% / 16.5%     | 8.0% / 20.3% / 19.8%       | 8.5% / 26.5% / 44.6%    | 3.3% / 22.2% / 51.9%     |

high shift = ( $>|0.5|$ ); moderate shift =  $|0.3|$  to  $|0.5|$ ; low shift =  $|0.1|$  to  $|0.2|$   $\Delta = 0$  is included in row labeled “% of scores that stayed the same ( $\Delta = 0$ )”

FTF = face-to-face; TCON = teleconference
